# Supplementary material for: High-throughput screening and classification of layered di-metal chalcogenides
Source: Royal Society of Chemistry journal article supplement (doi:10.1039/c9nr03752g), 2019-01-01
Supplement: c9nr03752g1.pdf [file c9nr03752g1.pdf]

## Supporting Information for: High-throughput Screening and Classification of Layered Di-Metal Chalcogenides

Table S1. The setup for generating the Monkhorst-Pack k-point meshes of 24 listed LDCs in Table 2.

| Compounds                                         | Number of k points |                |                | Compounds                                           | Number of k points |                |                |
|---------------------------------------------------|--------------------|----------------|----------------|-----------------------------------------------------|--------------------|----------------|----------------|
|                                                   | b <sub>1</sub>     | b <sub>2</sub> | b <sub>3</sub> |                                                     | b <sub>1</sub>     | b <sub>2</sub> | b <sub>3</sub> |
| 1 CsAg <sub>3</sub> Se <sub>2</sub>               | 8                  | 8              | 4              | 13 Cu <sub>3</sub> TlSe <sub>2</sub>                | 8                  | 4              | 4              |
| 2 KAgSe                                           | 8                  | 8              | 4              | 14 Cs <sub>3</sub> Bi <sub>7</sub> Se <sub>12</sub> | 4                  | 4              | 4              |
| 3 KCuSe                                           | 8                  | 8              | 4              | 15 BaCu <sub>2</sub> S <sub>2</sub>                 | 8                  | 8              | 6              |
| 4 Rb <sub>2</sub> Ag <sub>4</sub> S <sub>3</sub>  | 8                  | 8              | 8              | 16 BaCu <sub>2</sub> Se <sub>2</sub>                | 8                  | 8              | 6              |
| 5 CsAg <sub>3</sub> S <sub>2</sub>                | 8                  | 4              | 4              | 17 MgAl <sub>2</sub> S <sub>4</sub>                 | 6                  | 6              | 6              |
| 6 KCu <sub>3</sub> S <sub>2</sub>                 | 8                  | 4              | 4              | 18 ZnIn <sub>2</sub> S <sub>4</sub>                 | 7                  | 3              | 3              |
| 7 RbCu <sub>3</sub> S <sub>2</sub>                | 8                  | 8              | 8              | 19 Ba <sub>3</sub> Zr <sub>2</sub> S <sub>7</sub>   | 8                  | 8              | 4              |
| 8 KAg <sub>3</sub> Se <sub>2</sub>                | 8                  | 4              | 4              | 20 Ba <sub>2</sub> ZrS <sub>4</sub>                 | 8                  | 8              | 4              |
| 9 RbAg <sub>3</sub> Se <sub>2</sub>               | 8                  | 4              | 4              | 21 Ba <sub>4</sub> Zr <sub>3</sub> S <sub>10</sub>  | 6                  | 6              | 6              |
| 10 K <sub>2</sub> Ag <sub>4</sub> Se <sub>3</sub> | 8                  | 8              | 8              | 22 TlInS <sub>2</sub>                               | 10                 | 10             | 2              |
| 11 RbNaS                                          | 8                  | 8              | 6              | 23 Bi <sub>2</sub> PbSe <sub>4</sub>                | 5                  | 5              | 5              |
| 12 Cu <sub>3</sub> TlS <sub>2</sub>               | 8                  | 8              | 8              | 24 Bi <sub>2</sub> Pb <sub>2</sub> Se <sub>5</sub>  | 8                  | 8              | 2              |

Table S2. The in-plane direction which has the smallest effective mass and the corresponding effective mass of the LDCs in Fig. 6. As a result of the small effective mass, the carrier mobility along that in-plane direction may be high.

| Compounds                                      | Carrier Type | k path           | Effective mass ( $m_0$ ) |
|------------------------------------------------|--------------|------------------|--------------------------|
| BaCu <sub>2</sub> S <sub>2</sub>               | electron     | $\Gamma$ -X      | 0.20                     |
| Ba <sub>2</sub> ZrS <sub>4</sub>               | electron     | $\Gamma$ -X      | 0.20                     |
| KAgSe                                          | electron     | $\Gamma$ -X      | 0.17                     |
| Cs <sub>3</sub> Bi <sub>7</sub> Se             | electron     | Y-X <sub>1</sub> | 0.22                     |
|                                                | hole         | Y-X <sub>1</sub> | 0.26                     |
| Rb <sub>2</sub> Ag <sub>4</sub> S <sub>3</sub> | electron     | $\Gamma$ -N      | 0.15                     |
|                                                | hole         | $\Gamma$ -X      | 0.16                     |
| TlInS <sub>2</sub>                             | electron     | K-M              | 0.31                     |
|                                                | hole         | $\Gamma$ -A      | 0.16                     |
| Bi <sub>2</sub> PbSe <sub>4</sub> -bulk        | electron     | Z-P <sub>1</sub> | 0.12                     |
|                                                | hole         | Z-P <sub>1</sub> | 0.24                     |
| MgAl <sub>2</sub> S <sub>4</sub> -bulk         | electron     | $\Gamma$ -X      | 0.24                     |
|                                                | hole         | $\Gamma$ -L      | 0.36                     |
| ZnIn <sub>2</sub> S <sub>4</sub> -bulk         | electron     | $\Gamma$ -Y      | 0.21                     |
|                                                | hole         | $\Gamma$ -Y      | 0.21                     |
| Bi <sub>2</sub> PbSe <sub>4</sub> -monolayer   | electron     | $\Gamma$ -M      | 0.22                     |
|                                                | hole         | $\Gamma$ -M      | 0.62                     |
| MgAl <sub>2</sub> S <sub>4</sub> - monolayer   | electron     | $\Gamma$ -K      | 0.24                     |
|                                                | hole         | $\Gamma$ -K      | 0.40                     |
| ZnIn <sub>2</sub> S <sub>4</sub> - monolayer   | electron     | $\Gamma$ -K      | 0.24                     |
|                                                | hole         | $\Gamma$ -K      | 0.34                     |
